# Supplementary material for: RNA polymerase supply and flux through the lac operon in Escherichia coli
Source: PubMed Central journal article supplement (PMC5052750; doi:10.1098/rstb.2016.0080), 2016-11-05
Supplement: rstb20160080supp1.pdf [file rstb20160080supp1.pdf]

**Supplementary Table 1: Primer sequences for qPCR**

| Probe    | Oligo name   | Oligodeoxyribonucleotide sequence (5'-3') |
|----------|--------------|-------------------------------------------|
| lac0     | Lac0 Fwd     | GCGTTGGCCGATTCATTAATGCAGC                 |
|          | Lac0 Rev     | CAAGGCGATTAAGTTGGGTAACGCCAG               |
| lac1     | Lac1 Fwd     | GGTTACGGCCAGGACAGTCG                      |
|          | Lac1 Rev     | CACATCTGAACTTCAGCCTCCAGTAC                |
| lac2     | Lac2 Fwd     | GAATCAGGCCACGGCGCTA                       |
|          | Lac2 Rev     | AACCGCCAAGACTGTTACCCATC                   |
| lac3     | Lac3 Fwd     | GCAATTTAACCGCCAGTCAGGC                    |
|          | Lac3 Rev     | TGATGCTGCCACGCGTGAG                       |
| lac4     | Lac4 Fwd     | TGCACTCATCCTCGCCGTTTTACTC                 |
|          | Lac4 Rev     | CCAAATACCCGCGTACCCTGTTC                   |
| lac5     | Lac5 Fwd     | GTAGGGGAAAACGCCTGGGTAG                    |
|          | Lac5 Rev     | CCACATGACTTCCGATCCAGACG                   |
| BglB     | bglB Fwd     | GGATCAAGCCGCTGGTAACG                      |
|          | bglB Rev     | CTGGCAACCAGTTGATGGTGGGA                   |
| Promoter | Promoter Fwd | TCGCAAGGACGAGAATTTCC                      |
|          | Promoter Rev | GTTTTTCAGCAGGTCGTTG                       |
| Lac1357  | lacZ1357 Fwd | GACAGTATCGGCCTCAGGAA                      |
|          | lacZ1357 Rev | AACGTCGTGACTGGGAAAAC                      |
| Lac2720  | lacZ2720 Fwd | TCTCTCCAGGTAGCGAAAGC                      |
|          | lacZ2720 Rev | TAATCACGACGCGCTGTATC                      |
| Control  | Control Fwd  | CAGTCCATCAGGTAATTGCCG                     |
|          | Control Rev  | GCGCAAACCTGTTAATGCTGG                     |

The Table lists the base sequences of oligo pairs used to quantify specific DNA segments. The lac0 probe targets the *E. coli lac* operon promoter region, whilst the lac1-5 probes target different segments of the *lac* operon (illustrated in Figure 1). The BglB probe serves as a control, targeting a non-expressed segment of the *E. coli* chromosome. The probes denoted 'Promoter' amplify promoter fragments cloned in the pRW50 low copy number broad host range *lac* expression vector [30], and the Lac1357 and Lac2720 probes target *lac* operon sequences downstream of these cloned promoters (illustrated in Figure 3). The probe denoted 'Control' target a non-expressed segment of pRW50.
